# Supplementary material for: Upgraded User-Friendly Image-Activated Microfluidic Cell Sorter Using an Optimized and Fast Deep Learning Algorithm
Source: MDPI journal article supplement (doi:10.3390/mi13122105), 2022-11-29
Supplement: s1 [file s1]

# Supplementary data

**Upgraded user-friendly image-activated microfluidic cell sorter using an optimized and fast deep learning algorithm**

Keondo Lee<sup>1</sup>, Seong-Eun Kim<sup>1</sup>, Seokho Nam<sup>1</sup>, Junsang Doh<sup>2</sup>, and Wan Kyun Chung<sup>1\*</sup>

<sup>1</sup>Department of Mechanical Engineering, Pohang University of Science and Technology, Pohang 37673, Korea

<sup>2</sup>Department of Materials Science and Engineering, Seoul National University, Seoul 08826, Korea

\* Correspondence: wkchung@postech.ac.kr (W.K.C.)

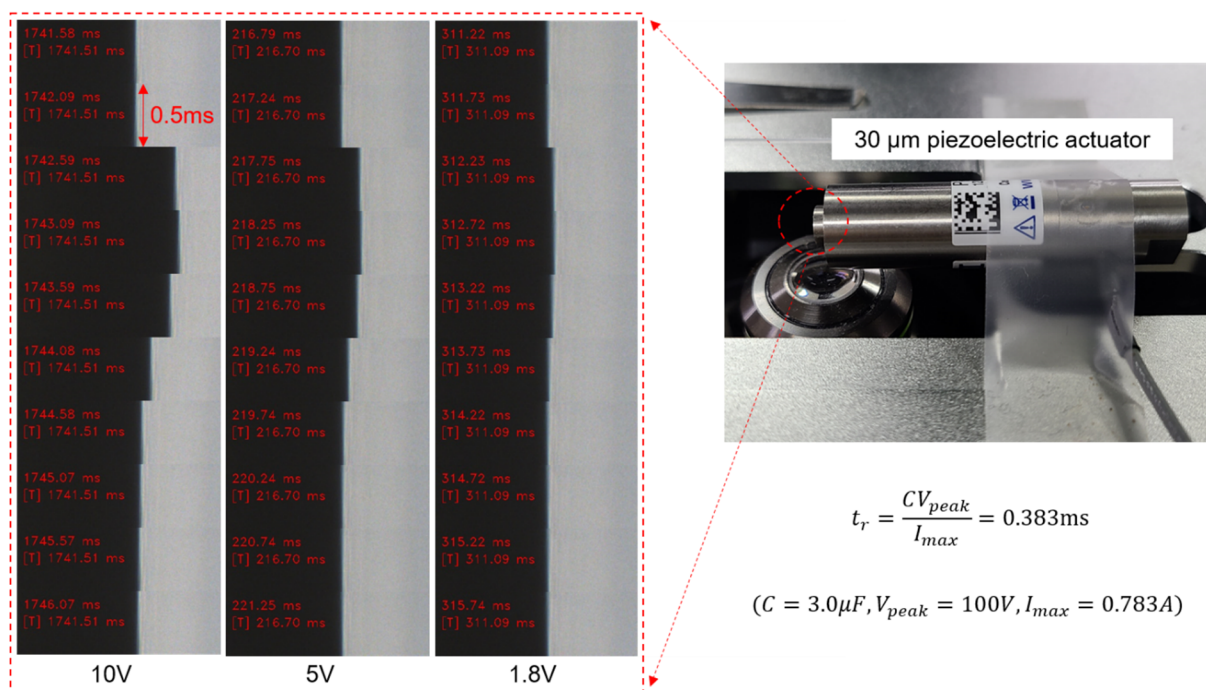

**Figure S1.** Microscopic images recorded at 2000 fps show how a 30  $\mu\text{m}$  piezoelectric actuator expands and contracts after a sorting signal. The calculated rising time of the 30  $\mu\text{m}$  piezoelectric actuator is 0.383 ms at 100V.

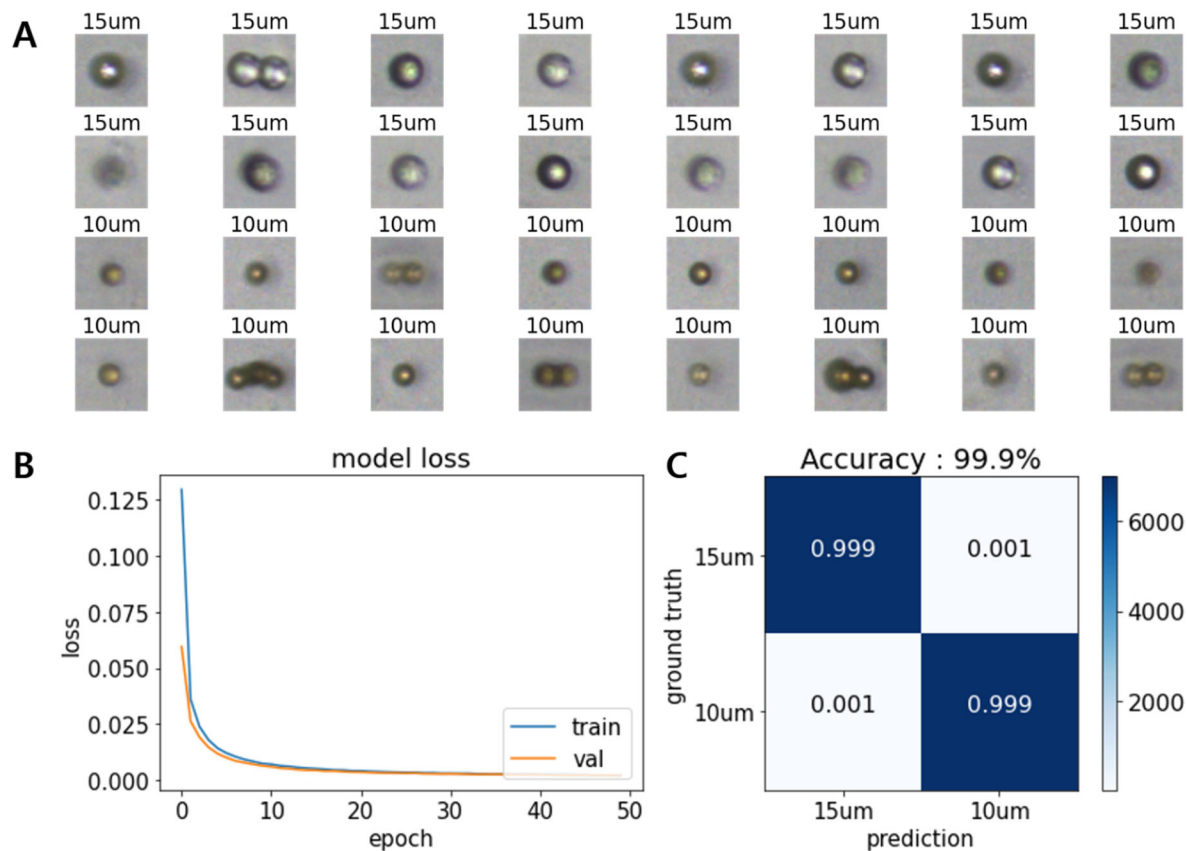

**Figure S2.** (A) Fluorescent bead images obtained using the upgraded user-friendly image-activated microfluidic cell sorter, (B) Training Learning Curve, (C) Confusion matrix on the test set. 56,000 images of fluorescent beads were trained by ResNet18 for 50 epochs.

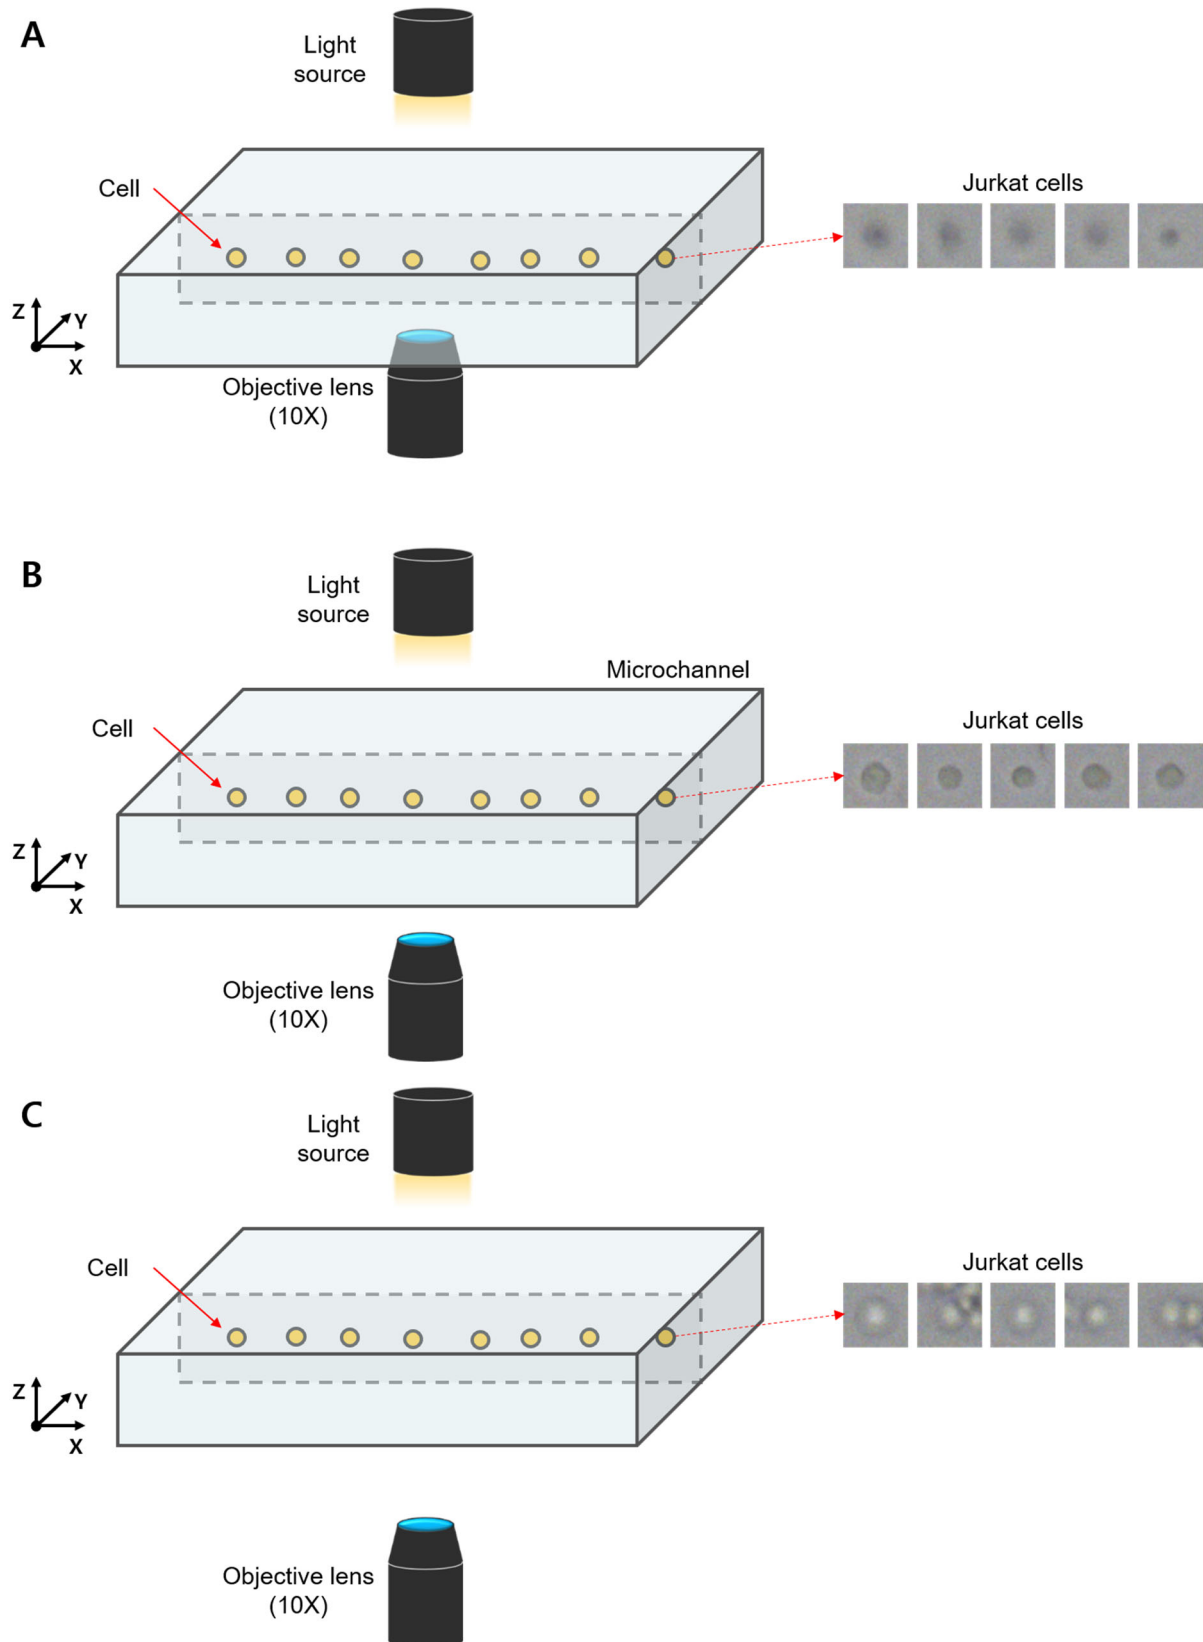

**Figure S3.** (A) Out of focus (too close), (B) In focus, (C) Out of focus (too far)

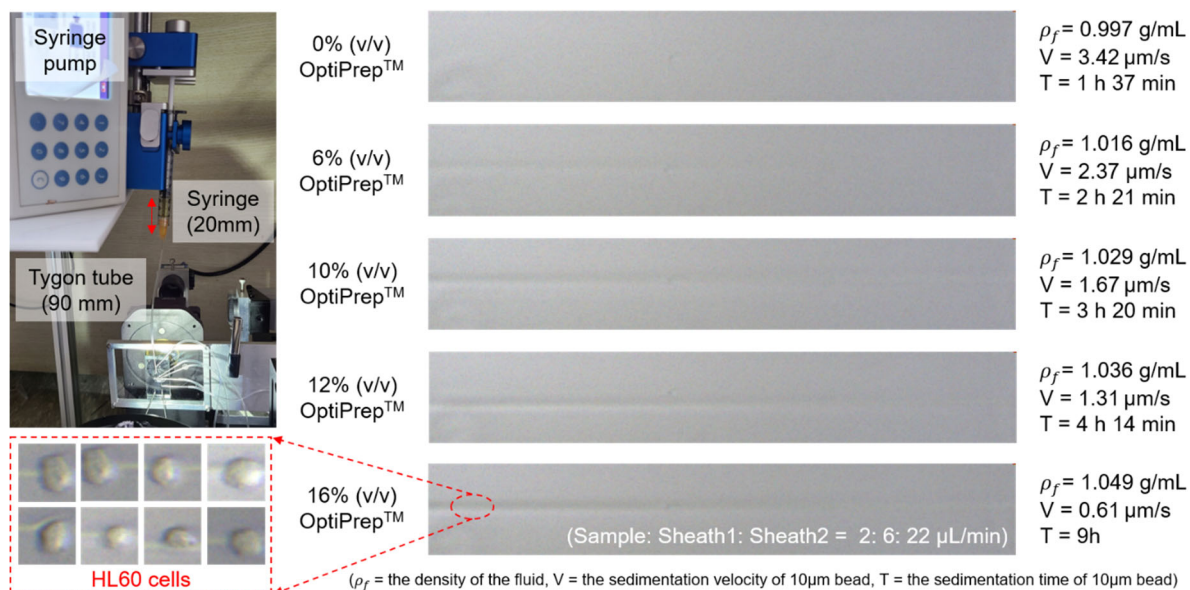

**Figure S4.** Microscopic images of focused sample flow according to OptiPrep™ concentration. As the OptiPrep™ concentration increases, the focused stream is photographed together in the background of the cell image. When OptiPrep™ concentration is 0%, the 10  $\mu\text{m}$  beads sink into the inlet of the syringe, which takes about an hour and 37 minutes.

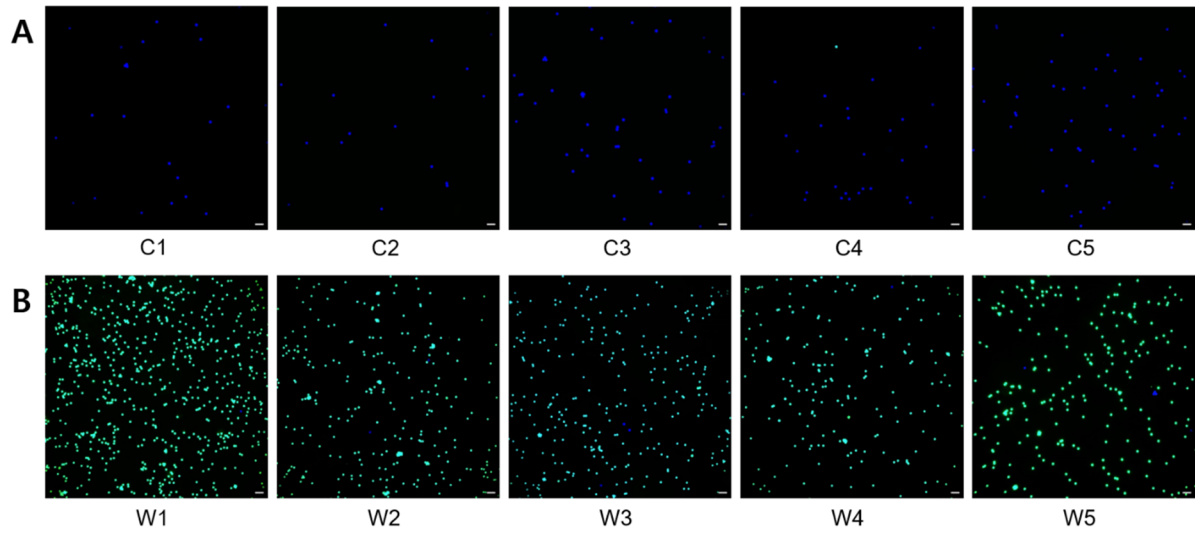

**Figure S5.** Fluorescence microscopy images of five consecutive bead sorting performed on the upgraded system (scale bar 100  $\mu\text{m}$ ). The blue and green dots indicate 15  $\mu\text{m}$  and 10  $\mu\text{m}$  beads, respectively. (A) Collection channel (Post-sorting), (B) Waste channel.

**Table S1.** Ratios of 15  $\mu\text{m}$  and 10  $\mu\text{m}$  beads in collection and waste outlets. The results in this table were evaluated by manually counting the dots with a fluorescence microscope.

|                   | 15 $\mu\text{m}$ (Blue) | 10 $\mu\text{m}$ (Green) |    | 15 $\mu\text{m}$ (Blue) | 10 $\mu\text{m}$ (Green) |
|-------------------|-------------------------|--------------------------|----|-------------------------|--------------------------|
| C1                | 99.7%                   | 0.3%                     | W1 | 0.2%                    | 99.8%                    |
| C2                | 100.0%                  | 0.0%                     | W2 | 0.1%                    | 99.9%                    |
| C3                | 98.5%                   | 1.5%                     | W3 | 0.5%                    | 99.5%                    |
| C4                | 99.2%                   | 0.8%                     | W4 | 0.5%                    | 99.5%                    |
| C5                | 99.7%                   | 0.3%                     | W5 | 2.9%                    | 97.1%                    |
| Pre-sorting ratio | 14.9%                   | 85.1%                    |    |                         |                          |
